# Supplementary material for: Self-assembled proteinticle nanostructures for 3-dimensional display of antibodies
Source: Royal Society of Chemistry journal article supplement (doi:10.1039/c4nr03635b), 2014-10-07
Supplement: c4nr03635b1.pdf [file c4nr03635b1.pdf]

**Supplementary Information**

**Self-assembled Proteinticle Nanostructures for  
3-dimensional Display of Antibodies**

*Eun Jung Lee<sup>¶</sup>, Euna Lee<sup>¶</sup>, Hyun Jin Kim, Jong-Hwan Lee, Keum-Young Ahn,*

*Jin-Seung Park<sup>†</sup>, and Jeewon Lee\**

<sup>¶</sup> These authors contributed equally to this work

Department of Chemical and Biological Engineering  
College of Engineering, Korea University  
Anam-Ro 145, Seoul 136-713, Republic of Korea

\* Corresponding author:

Phone: +82-2-3290-3304, Fax: +82-2-926-6102, E-mail: [leejw@korea.ac.kr](mailto:leejw@korea.ac.kr).

(<sup>†</sup> Present address: Research Institute of Biotechnology, CJ Cheiljedang Co., 92,  
Gayang-dong, Gangseo-gu, Seoul 157-724, Republic of Korea)

Figure S-1

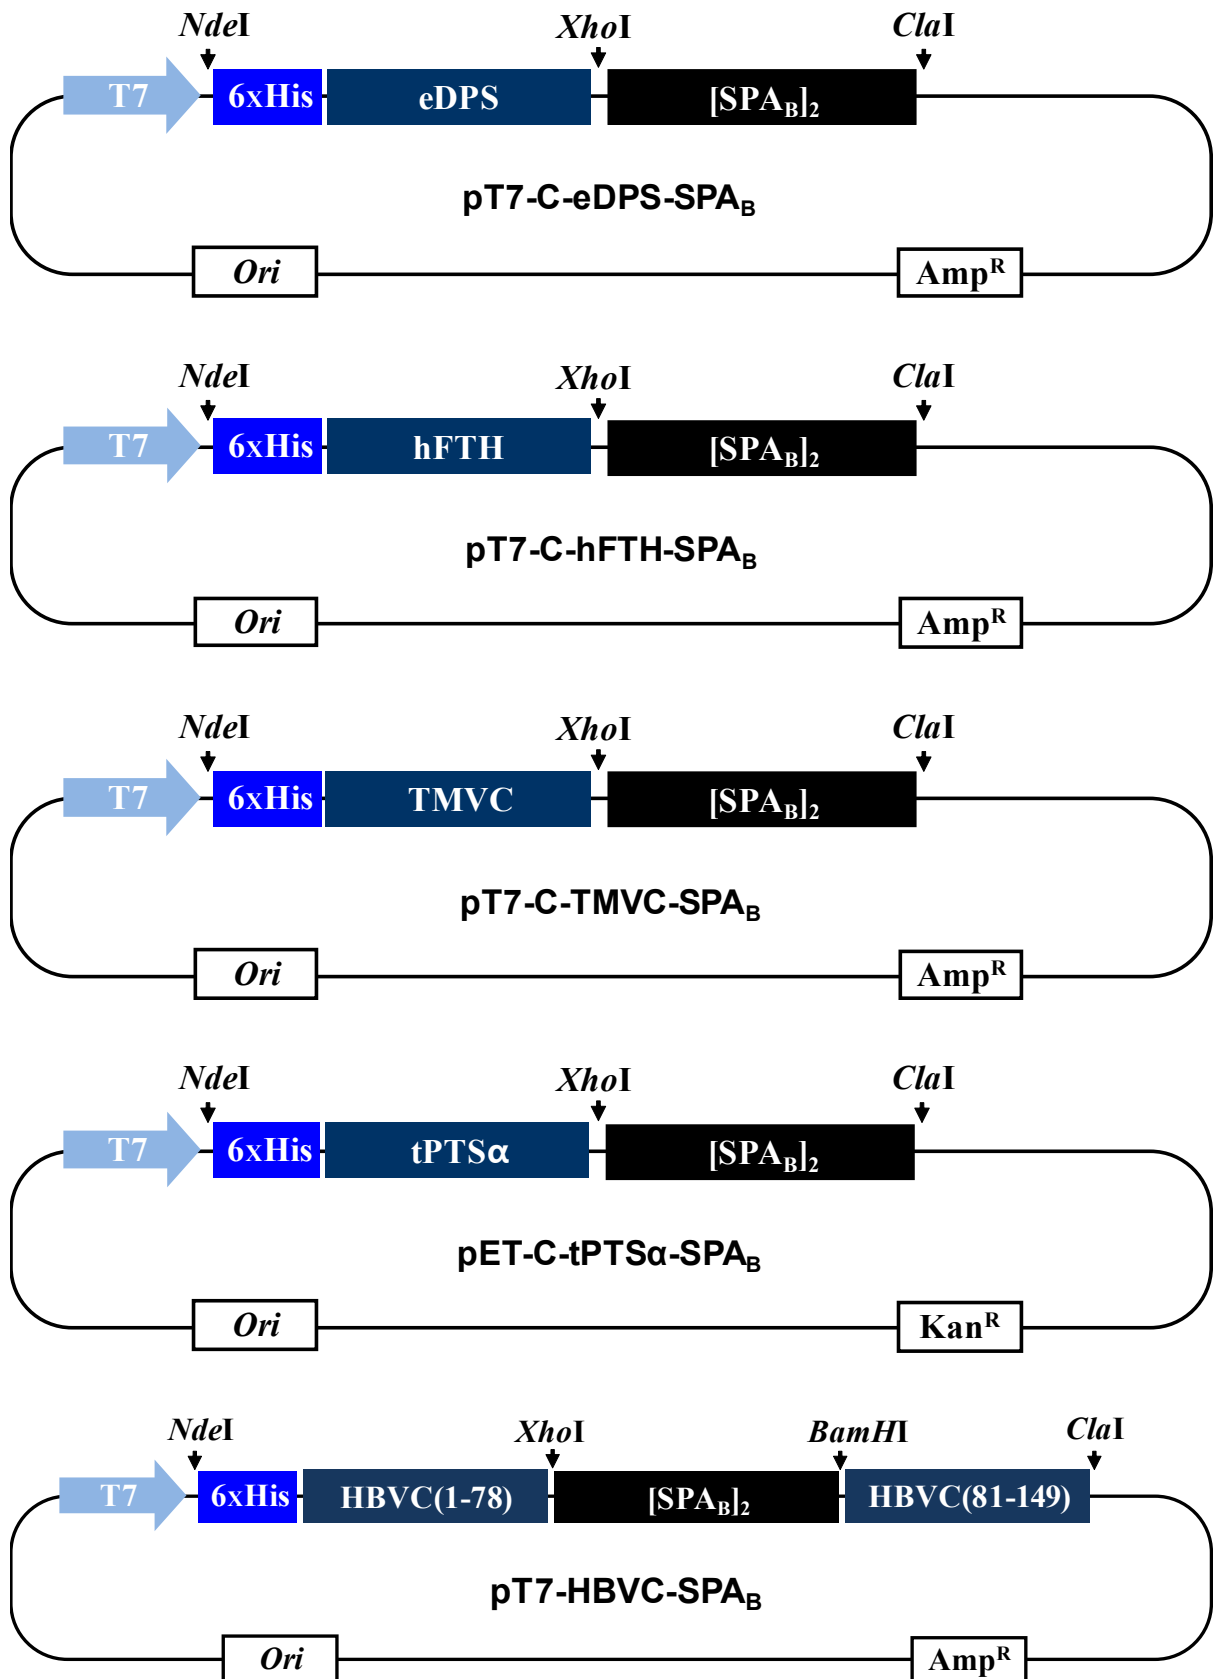

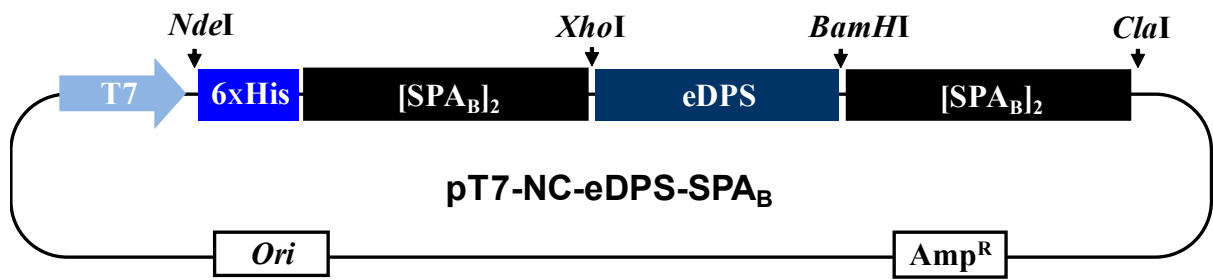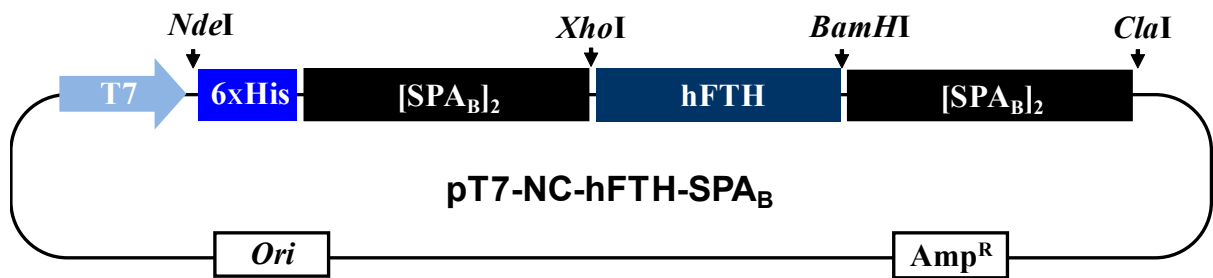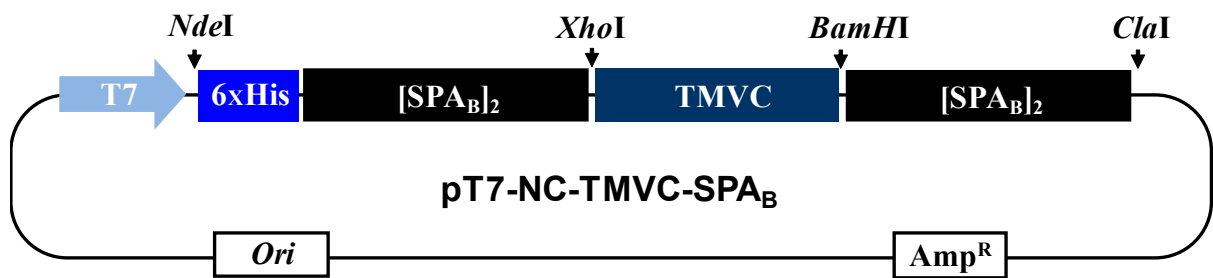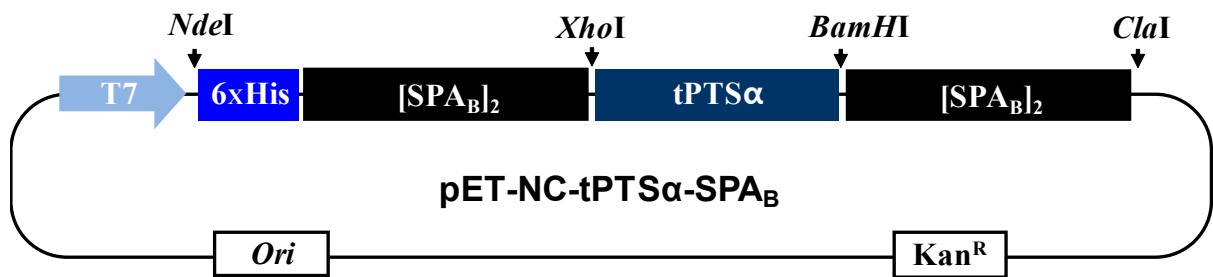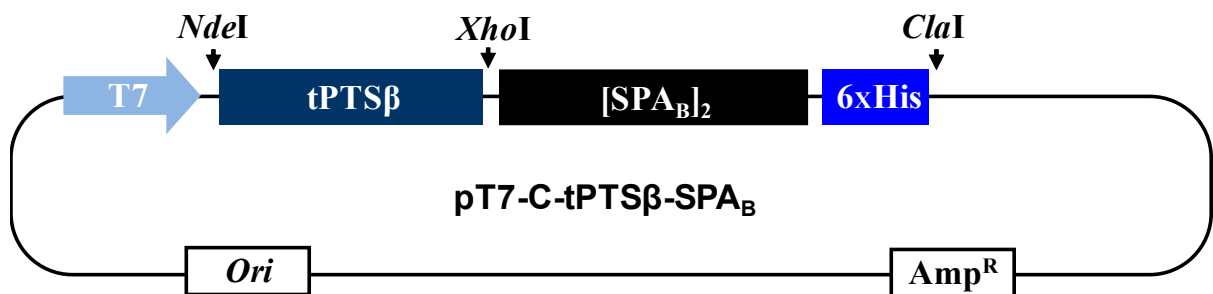

Figure S-2 (A)

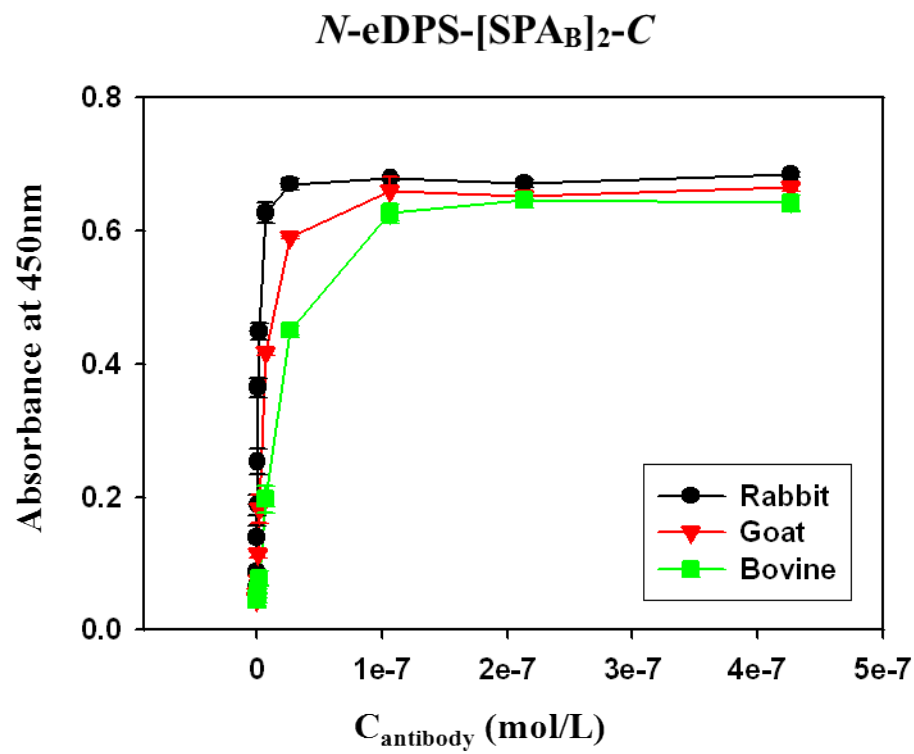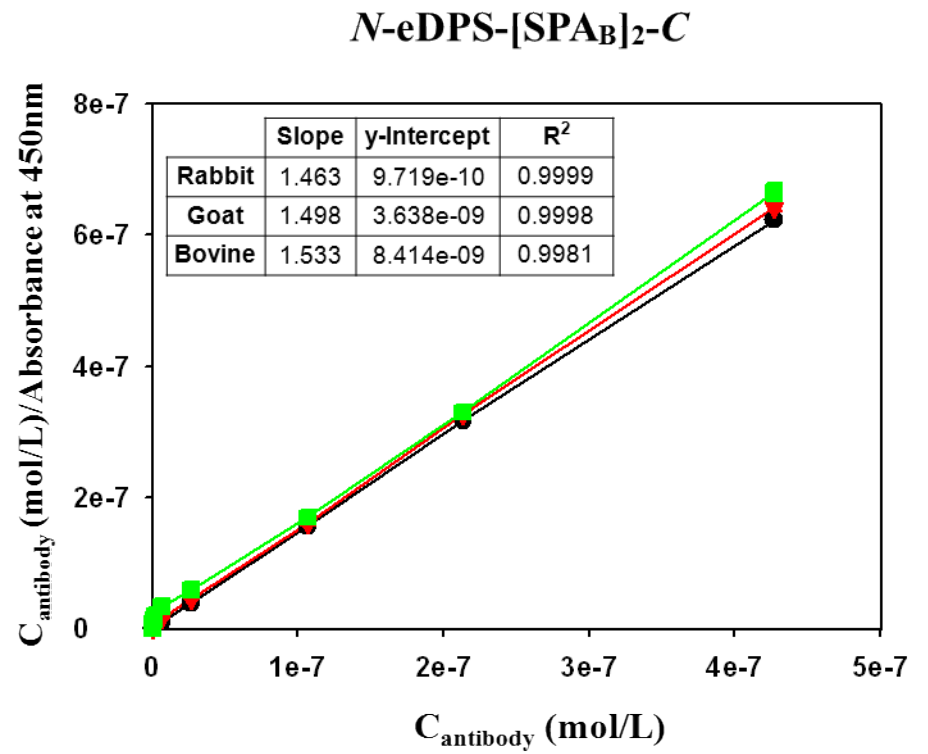

Figure S-2 (B)

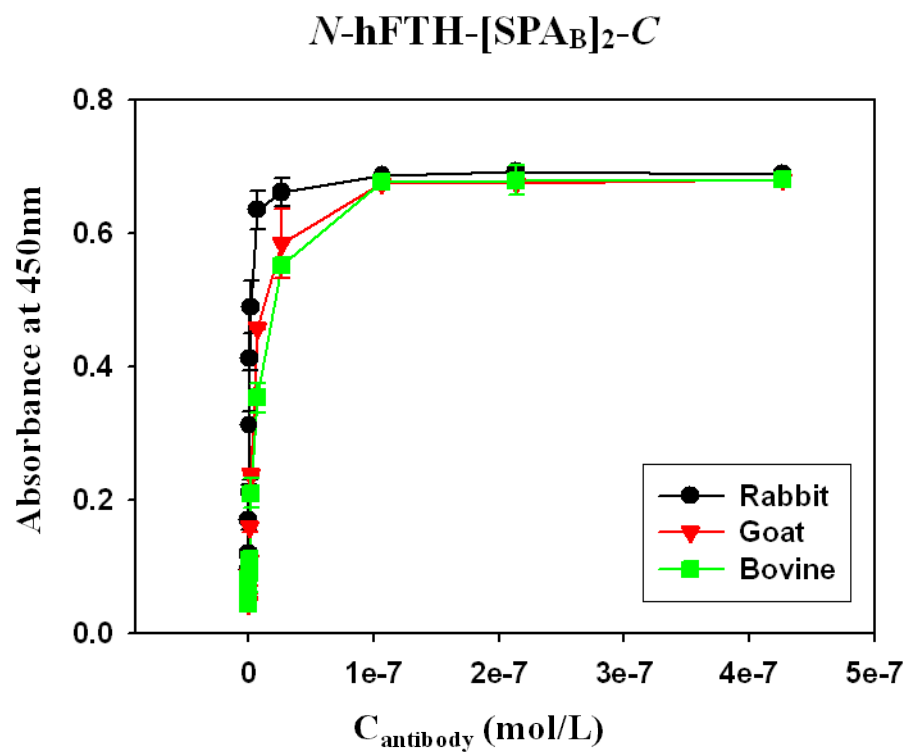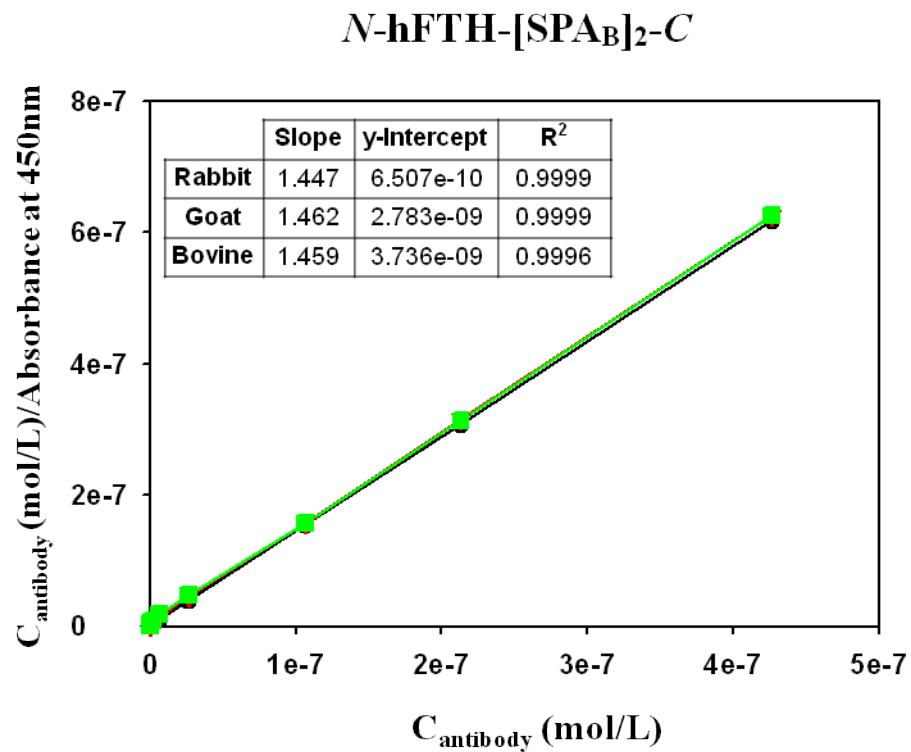

Figure S-2 (C)

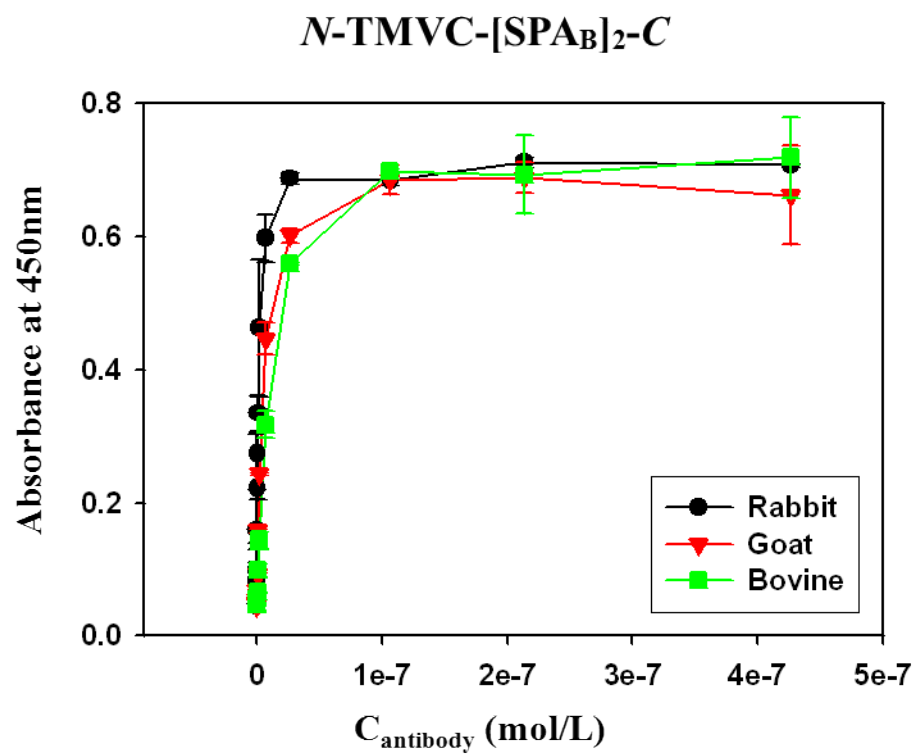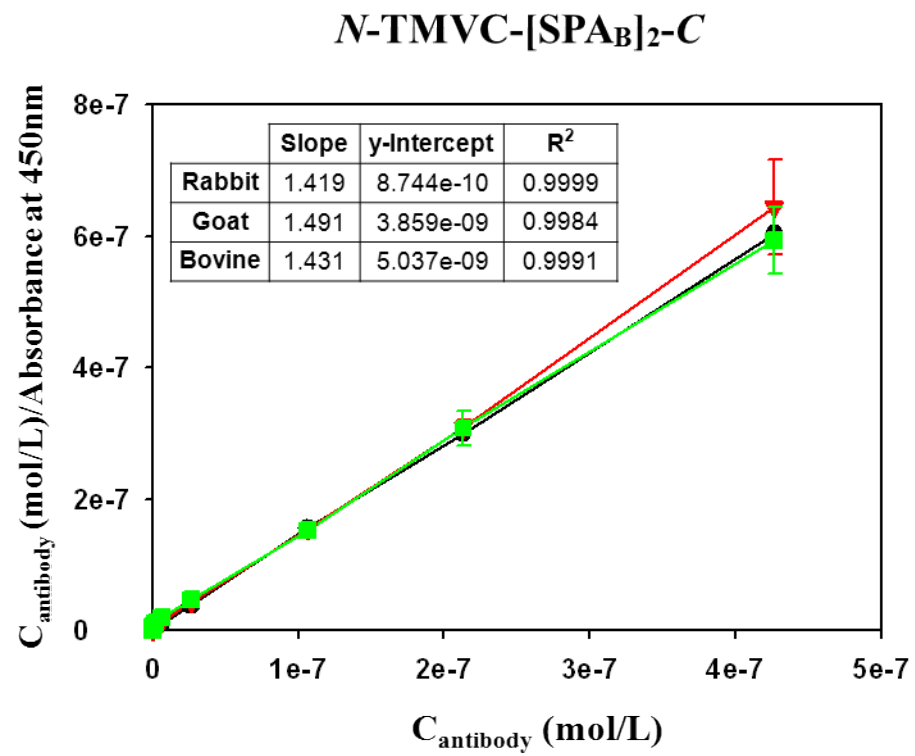

Figure S-2 (D)

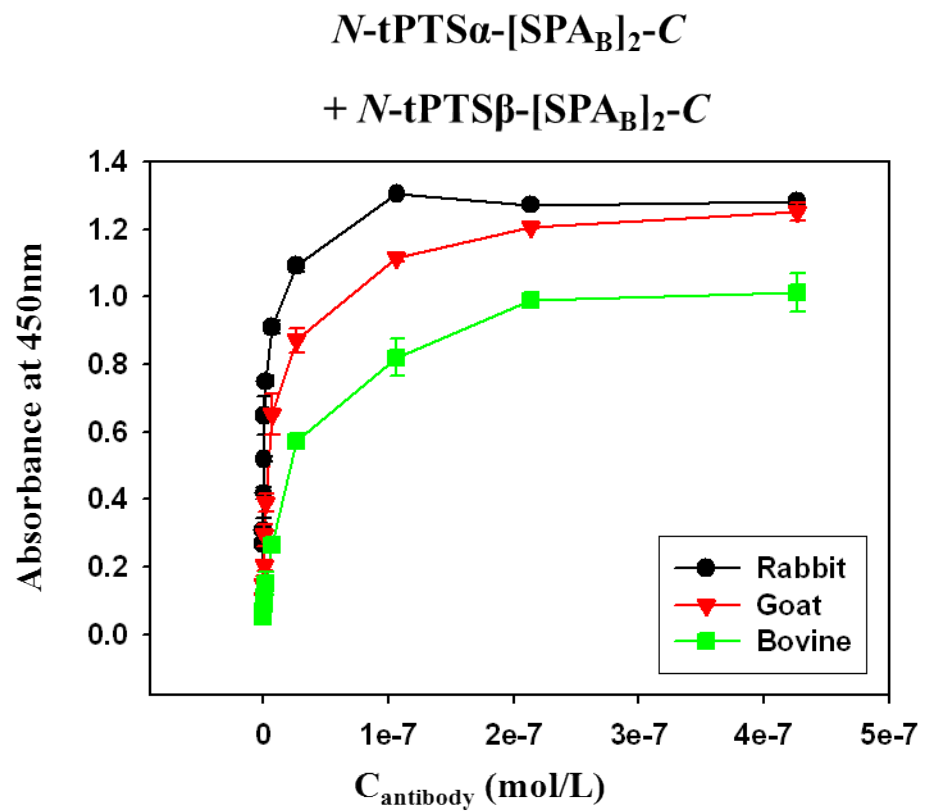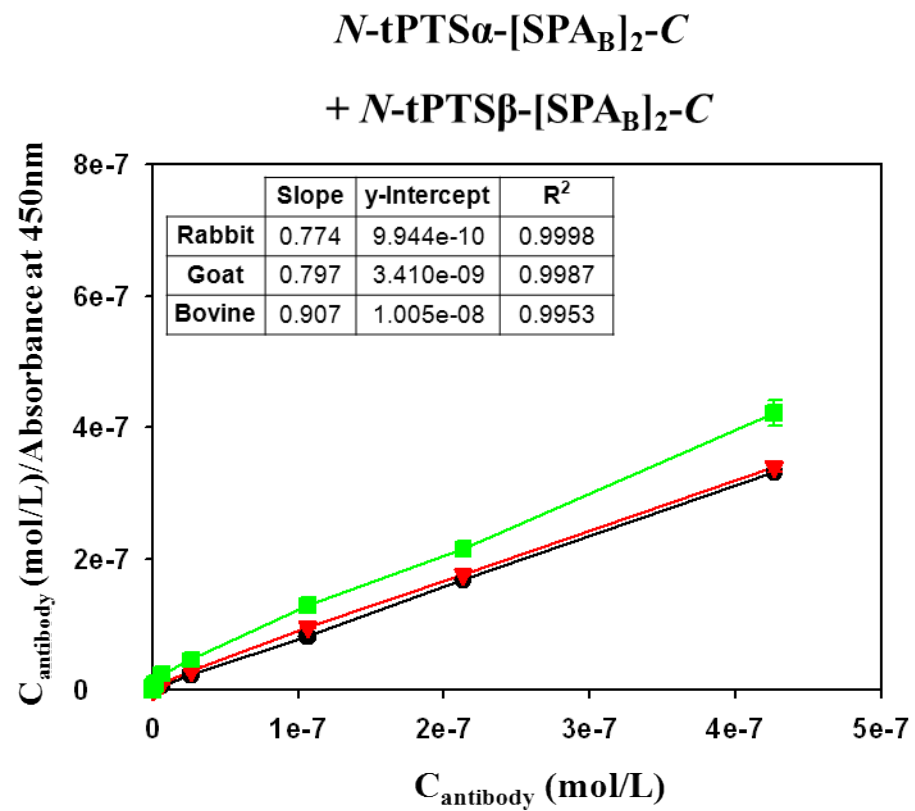

Figure S-2 (E)

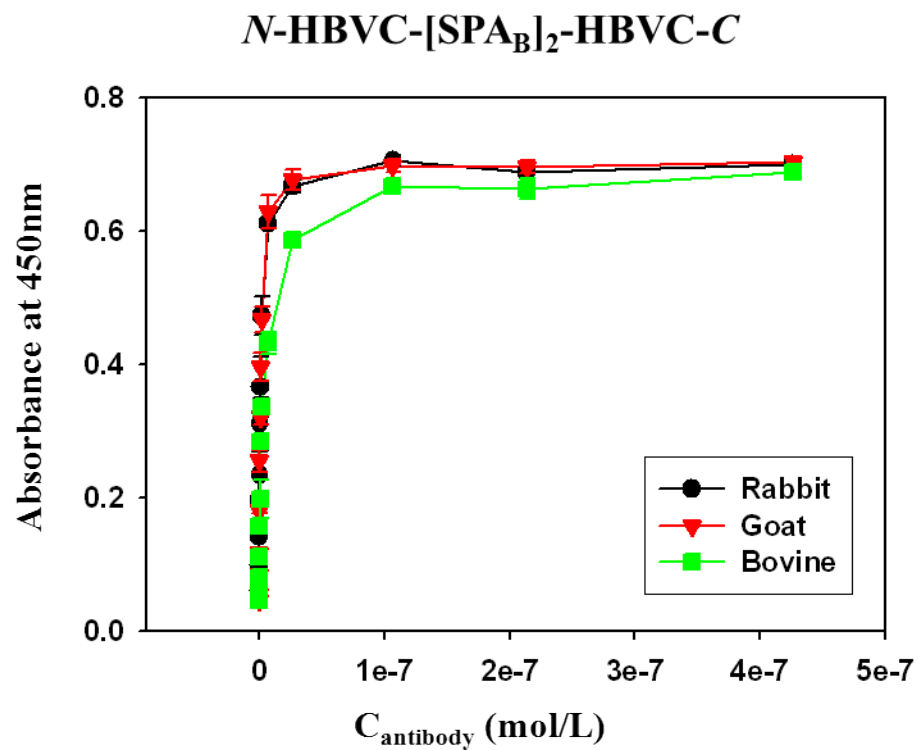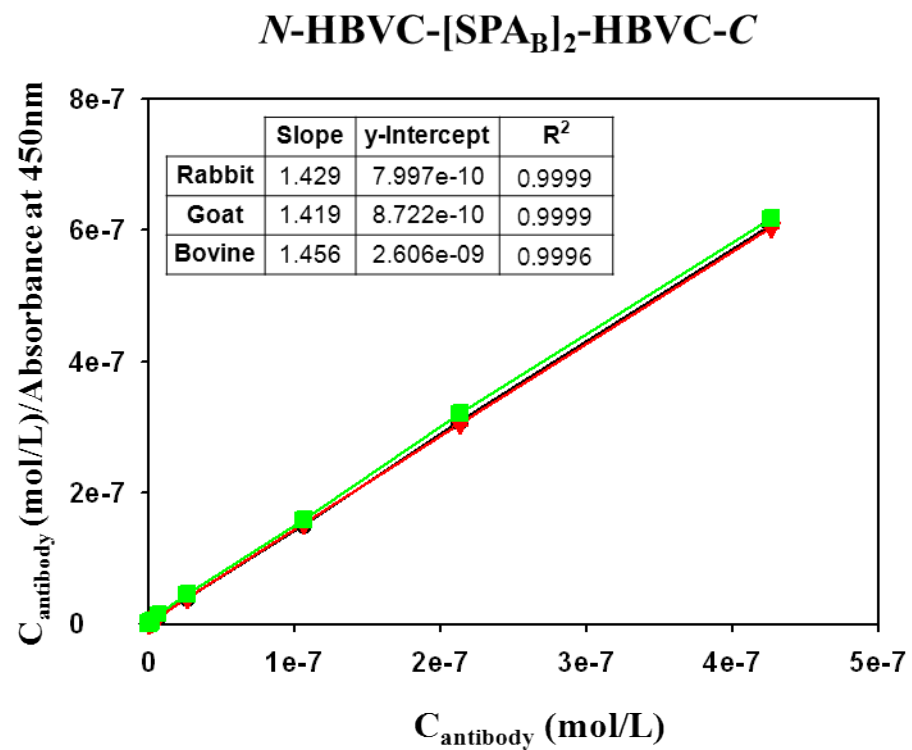



Figure S-2 (F)

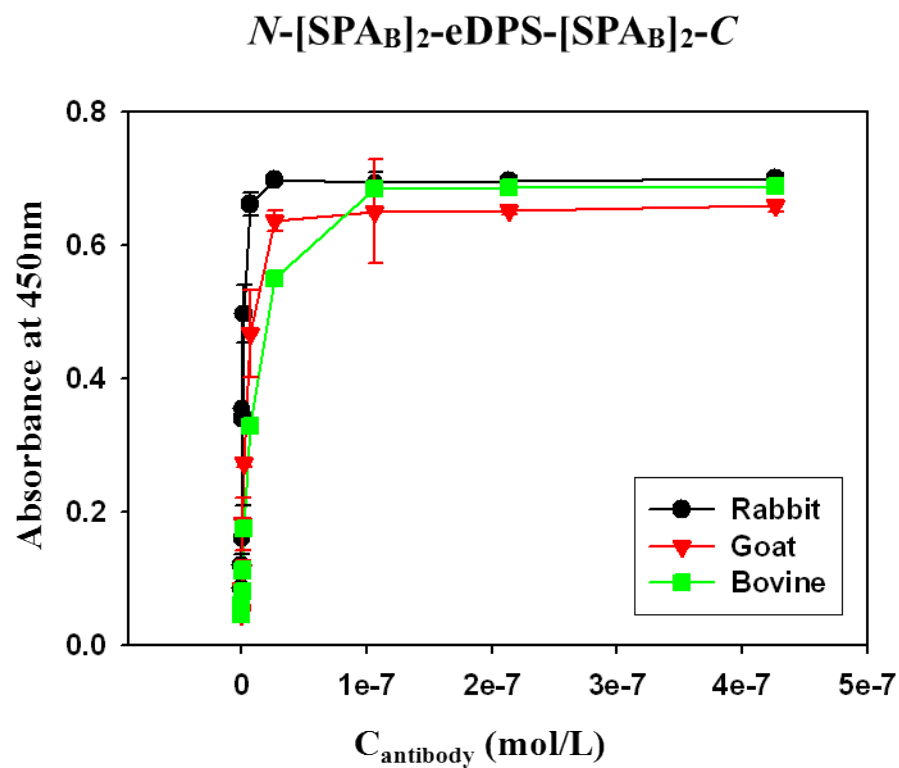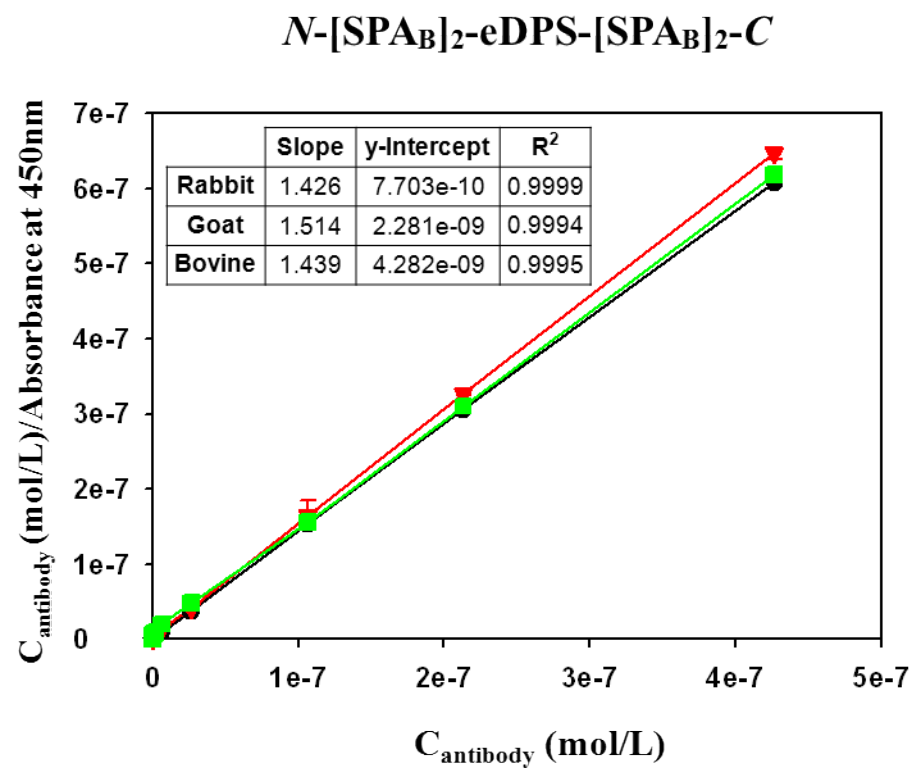

Figure S-2 (G)

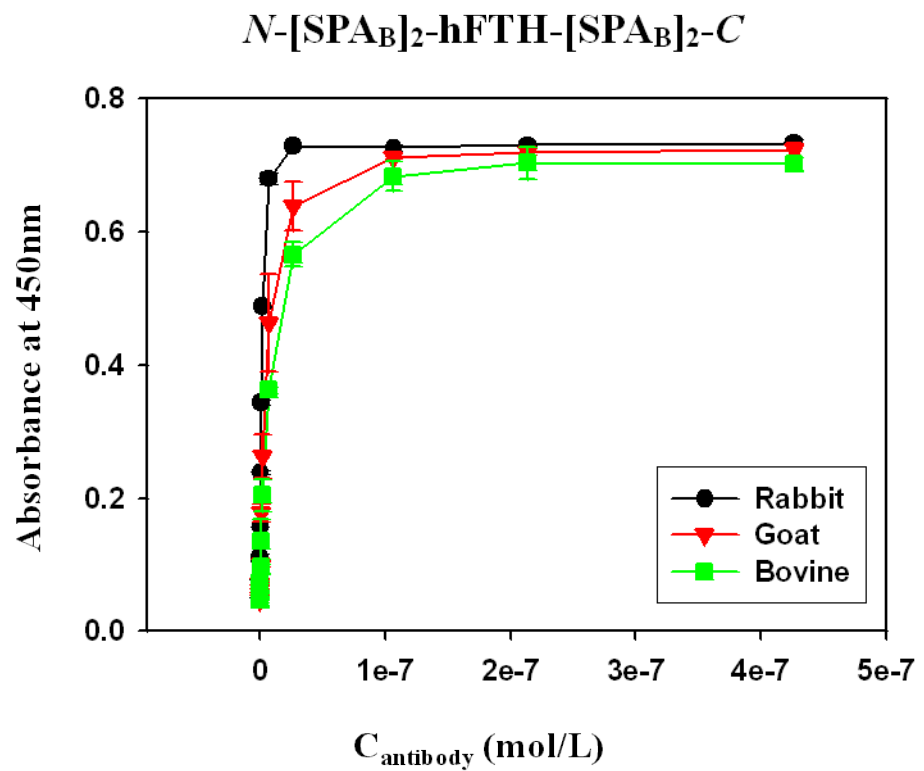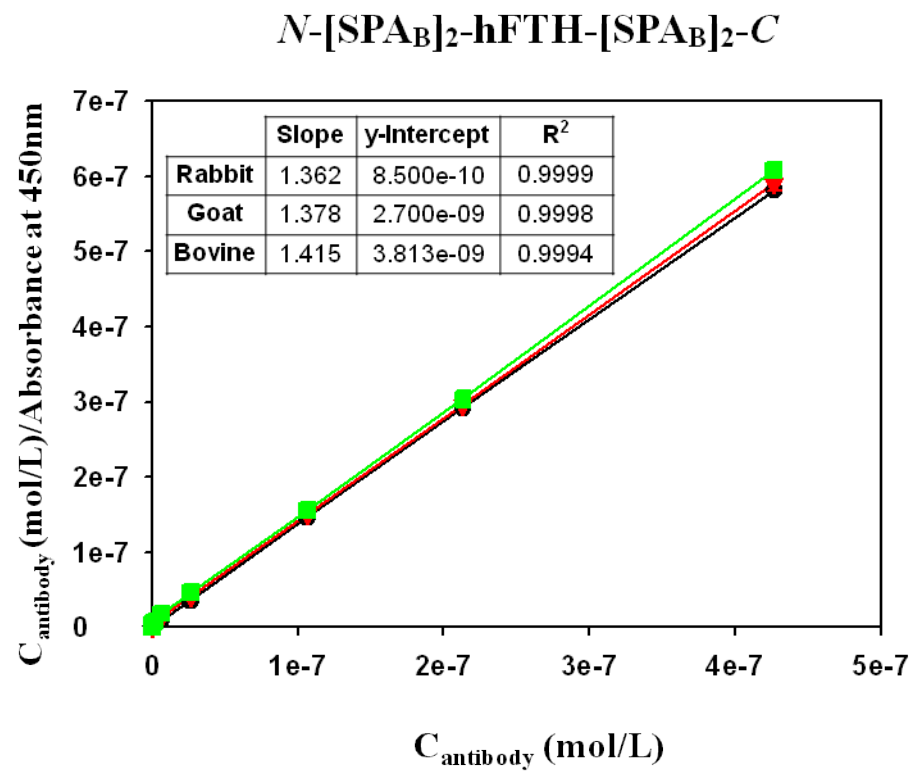

Figure S-2 (H)

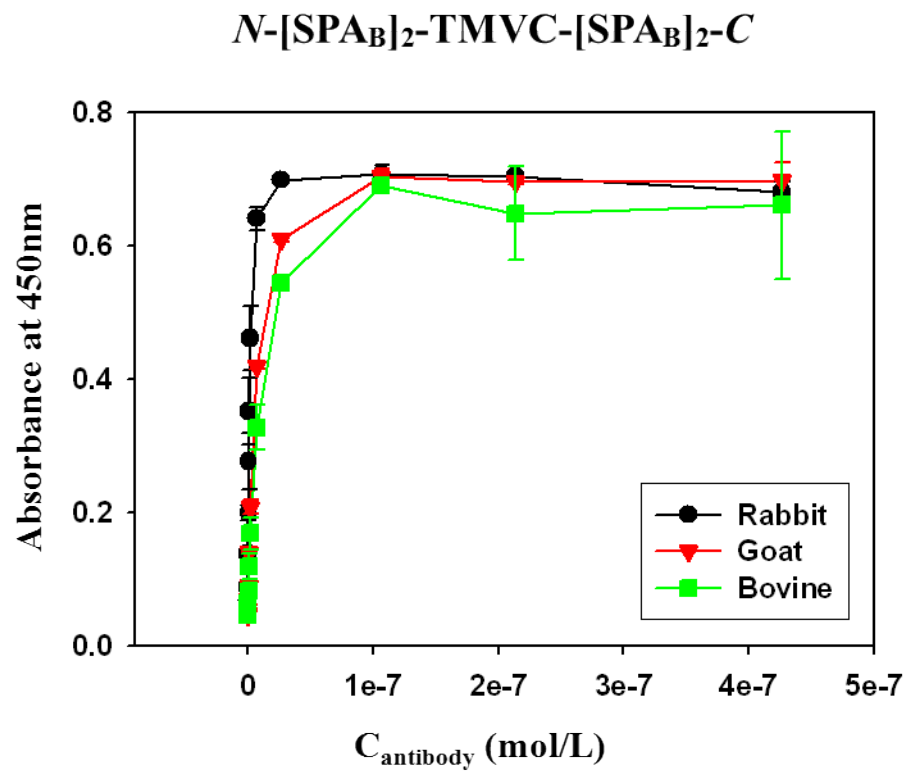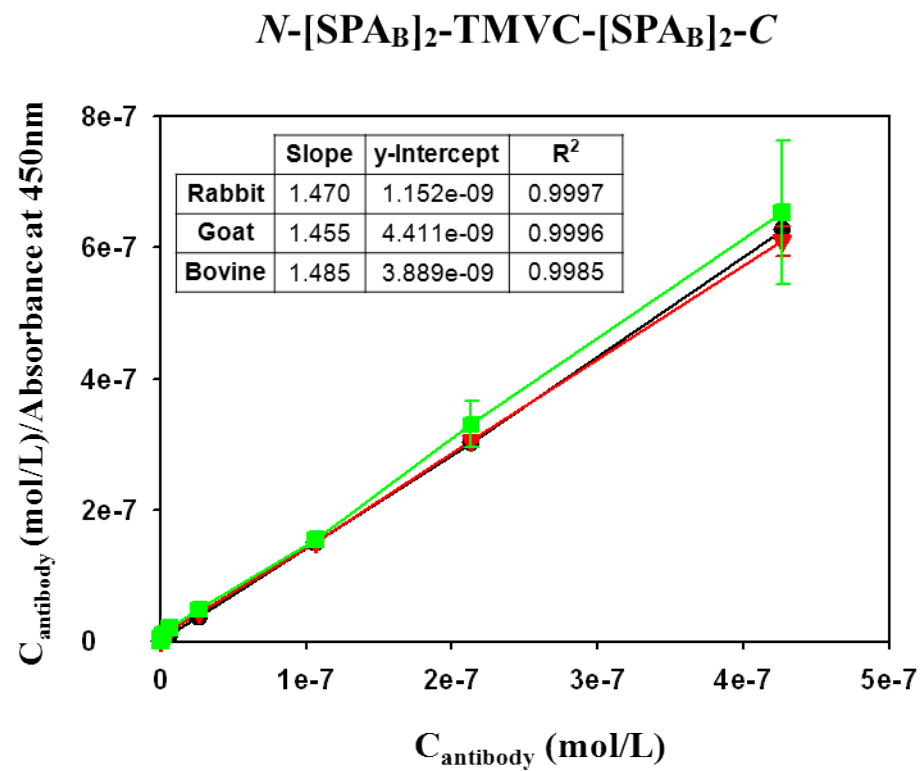

Figure S-2 (I)

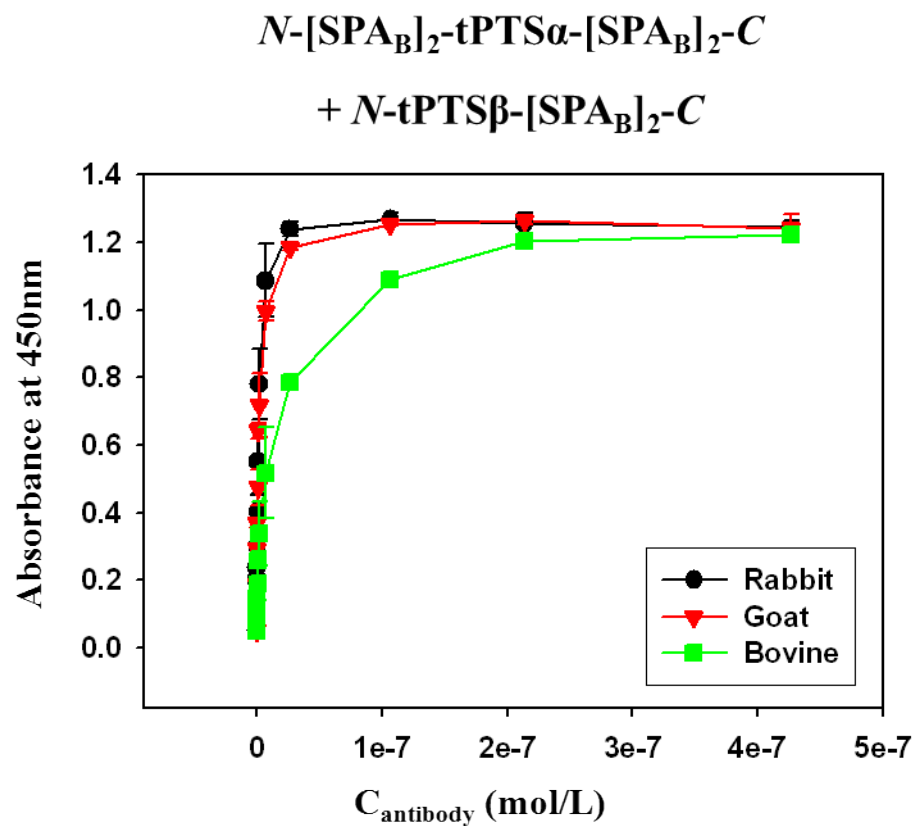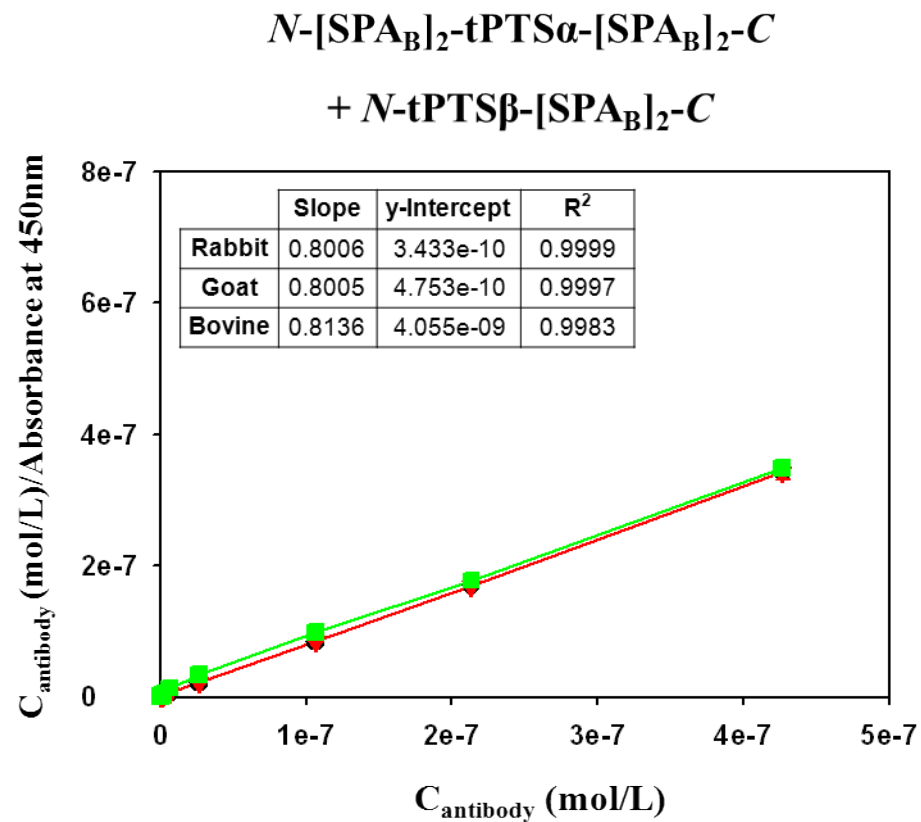

Figure S-3(A)

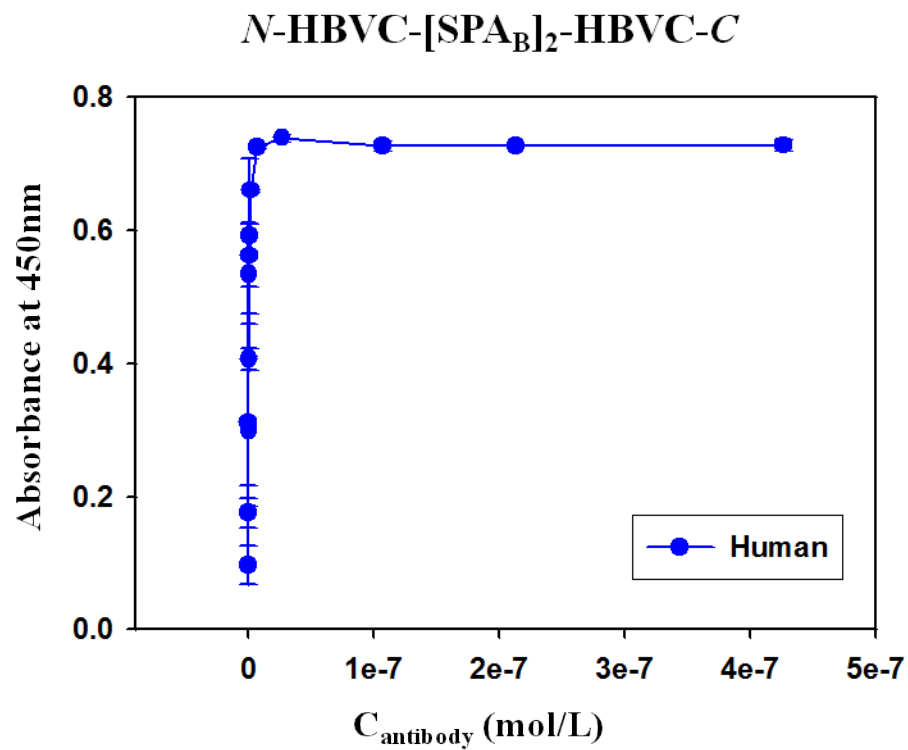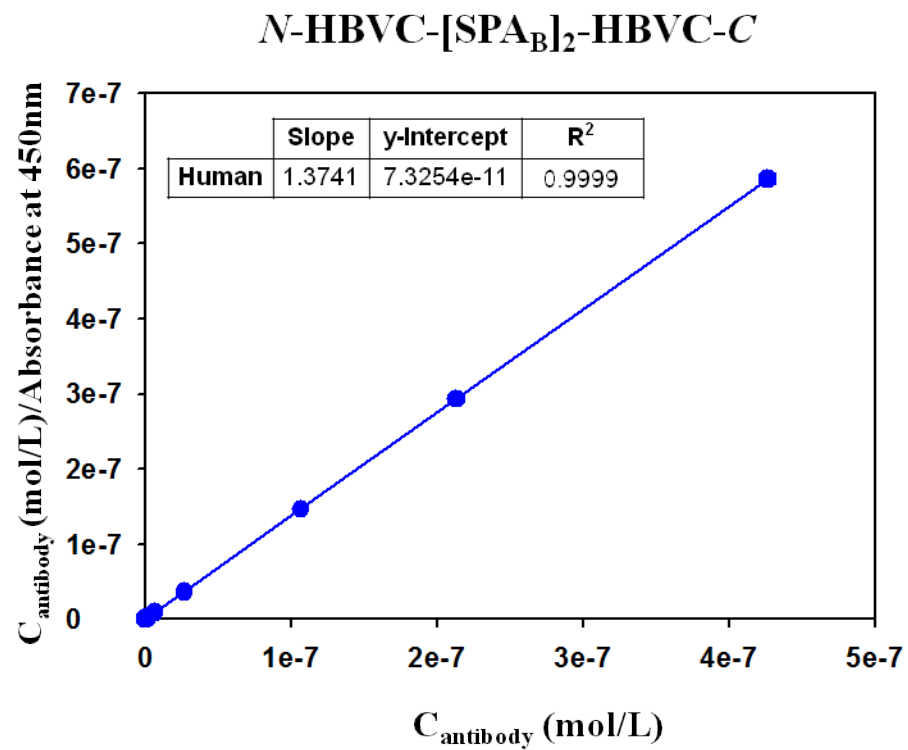

Estimated  $K_D$ :  $0.53 \times 10^{-10}$

Figure S-3(B)

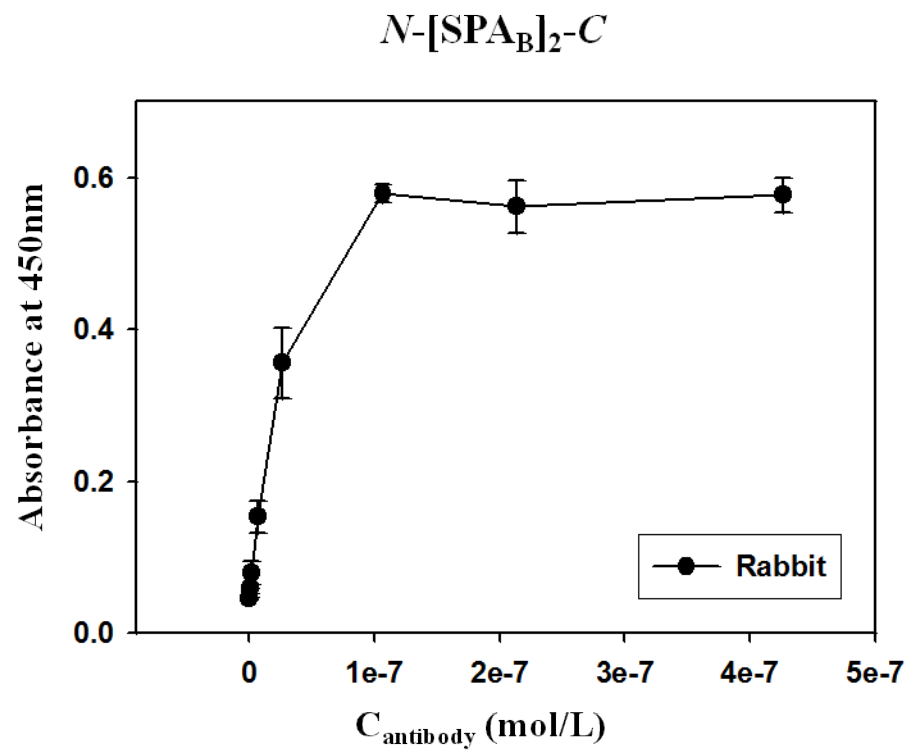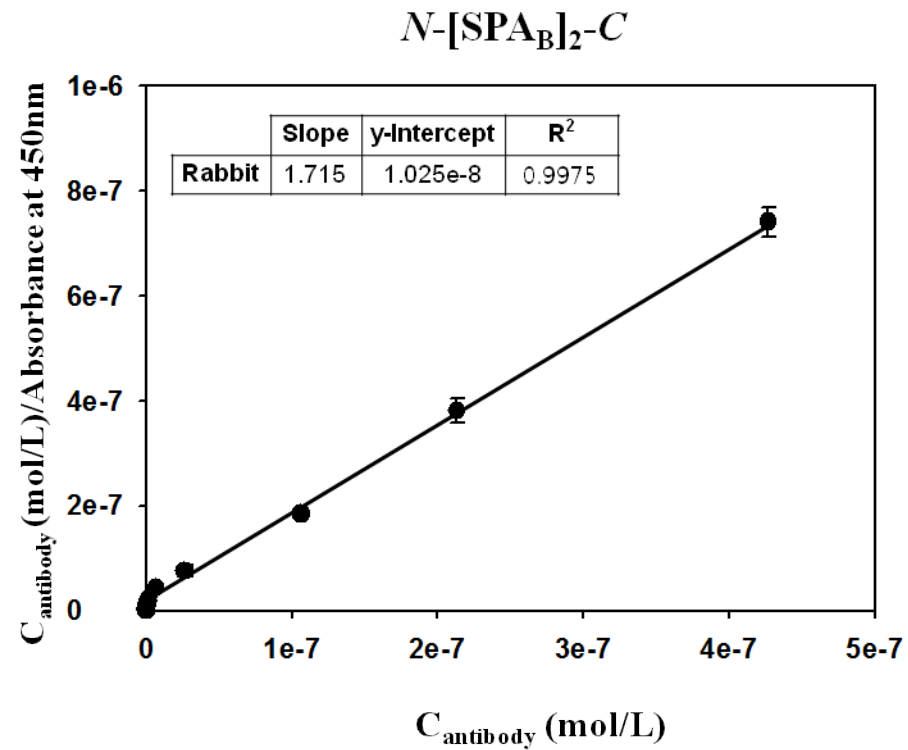

Estimated  $K_D$ :  $59.77 \times 10^{-10}$

## Supplementary Figure Legends

**Figure S-1.** Plasmid expression vectors used for the synthesis of surface-engineered proteinticles displaying SPA<sub>B</sub>.

**Figure S-2.** Absorbance signals measured from HRP-IgG adsorbed on SPA<sub>B</sub> on proteinticles (left) and re-plot of the measured absorbance signals by linearized form  $[C/Abs = C/Abs(sat) + K_D/Abs(sat)]$ , where C, Abs, Abs(sat), and K<sub>D</sub> represent the concentration of HRP-IgG, absorbance signal, saturated absorbance signal, and dissociation constant, respectively] of Langmuir adsorption isotherm equation under the assumption that the adsorption of HRP-IgG on SPA<sub>B</sub> follows Langmuir adsorption isotherm model (right). The tandem SPA<sub>B</sub>, [SPA<sub>B</sub>]<sub>2</sub> was genetically inserted to the surface of proteinticle that is synthesized in *E. coli* through the self-assembly of engineered subunit protein: **(A)** *N*-eDPS-[SPA<sub>B</sub>]<sub>2</sub>-C, **(B)** *N*-hFTH-[SPA<sub>B</sub>]<sub>2</sub>-C, **(C)** *N*-TMVC-[SPA<sub>B</sub>]<sub>2</sub>-C, **(D)** *N*-tPTS $\alpha$ -[SPA<sub>B</sub>]<sub>2</sub>-C + *N*-tPTS $\beta$ -[SPA<sub>B</sub>]<sub>2</sub>-C, **(E)** *N*-HBVC-[SPA<sub>B</sub>]<sub>2</sub>-HBVC-C, **(F)** *N*-[SPA<sub>B</sub>]<sub>2</sub>-eDPS-[SPA<sub>B</sub>]<sub>2</sub>-C, **(G)** *N*-[SPA<sub>B</sub>]<sub>2</sub>-hFTH-[SPA<sub>B</sub>]<sub>2</sub>-C, **(H)** *N*-[SPA<sub>B</sub>]<sub>2</sub>-TMVC-[SPA<sub>B</sub>]<sub>2</sub>-C, and **(I)** *N*-[SPA<sub>B</sub>]<sub>2</sub>-tPTS $\alpha$ -[SPA<sub>B</sub>]<sub>2</sub>-C + *N*-tPTS $\beta$ -[SPA<sub>B</sub>]<sub>2</sub>-C.

**Figure S-3.** **(A)** Absorbance signals measured from human HRP-IgG adsorbed on SPA<sub>B</sub> on HBVC (left) and re-plot of the measured absorbance signals by linearized form of Langmuir adsorption isotherm equation (right). **(B)** Absorbance signals measured from rabbit HRP-IgG adsorbed on (SPA<sub>B</sub>)<sub>2</sub>, directly immobilized onto porous hydrogel without proteinticles (left) and re-plot of the measured absorbance signals by linearized form of Langmuir adsorption isotherm equation (right).
